# Supplementary material
Source: publisher figshare collection journal article supplement (https://acs.figshare.com/ndownloader/files/8350613)
Supplement: Supplementary file 1 [file 8350613]

## Sheet: Table S1
Table S1. Sequences of all oligonucleotide probes used in this study
18S ribosomal RNA probes
ttgagacaagcatatgctacctggcAAAAAAAAAAAAA GACGCTAATAGTTAAGACGCTT
cattcgcagtttcactgtaccggccAAAAAAAAAAAAA GACGCTAATAGTTAAGACGCTT
gaattaccacagttatccaagtaggAAAAAAAAAAAAA GACGCTAATAGTTAAGACGCTT
gggttggttttgatctgataaatgcAAAAAAAAAAAAA GACGCTAATAGTTAAGACGCTT
gatagggcagacgttcgaatgggtcAAAAAAAAAAAAA GACGCTAATAGTTAAGACGCTT
gttatttttcgtcactacctccccgAAAAAAAAAAAAA GACGCTAATAGTTAAGACGCTT
gtggactcattccaattacagggccAAAAAAAAAAAAA GACGCTAATAGTTAAGACGCTT
tacgctattggagctggaattaccgAAAAAAAAAAAAA GACGCTAATAGTTAAGACGCTT
gcgggacactcagctaagagcatcgAAAAAAAAAAAAA GACGCTAATAGTTAAGACGCTT
ctcgggcctgctttgaacactctaaAAAAAAAAAAAAA GACGCTAATAGTTAAGACGCTT
acaaaatagaaccgcggtcctattcAAAAAAAAAAAAA GACGCTAATAGTTAAGACGCTT
gtccaagaatttcacctctagcggcAAAAAAAAAAAAA GACGCTAATAGTTAAGACGCTT
aacctccgactttcgttcttgattaAAAAAAAAAAAAA GACGCTAATAGTTAAGACGCTT
catcgtttatggtcggaactacgacAAAAAAAAAAAAA GACGCTAATAGTTAAGACGCTT
aagtttcagctttgcaaccatactcAAAAAAAAAAAAA GACGCTAATAGTTAAGACGCTT
aggtttcccgtgttgagtcaaattaAAAAAAAAAAAAA GACGCTAATAGTTAAGACGCTT
cacccacggaatcgagaaagagctaAAAAAAAAAAAAA GACGCTAATAGTTAAGACGCTT
ggaattaaccagacaaatcgctccaAAAAAAAAAAAAA GACGCTAATAGTTAAGACGCTT
gtcgcgtaactagttagcatgccagAAAAAAAAAAAAA GACGCTAATAGTTAAGACGCTT
tgttattgctcaatctcgggtggctAAAAAAAAAAAAA GACGCTAATAGTTAAGACGCTT
tcacgaatggggttcaacgggttacAAAAAAAAAAAAA GACGCTAATAGTTAAGACGCTT
cacttactgggaattcctcgttcatAAAAAAAAAAAAA GACGCTAATAGTTAAGACGCTT
ggtgtgtacaaagggcagggacttaAAAAAAAAAAAAA GACGCTAATAGTTAAGACGCTT
agatagtcaagttcgaccgtcttctAAAAAAAAAAAAA GACGCTAATAGTTAAGACGCTT
B-actin mRNA interaction probes
GCGCGTTGCGCCGCCGGGTTTTATA AAAAAAAAAAAAA GACGCTAATAGTTAAGACGCTT
GCGGGTGGACGCGACTCGACAGTGG AAAAAAAAAAAAA TATGACAGAACTAGACACTCTT
ACGAAGGAGCTGCAAAGAAGCTGTG AAAAAAAAAAAAA GACGCTAATAGTTAAGACGCTT
CGAACTGGTGGCGGGTGTGGACCGG AAAAAAAAAAAAA TATGACAGAACTAGACACTCTT
GACCAGCGCAGCGATATCGTCATCC AAAAAAAAAAAAA GACGCTAATAGTTAAGACGCTT
TTGCACATGCCGGAGCCGTTGTCGA AAAAAAAAAAAAA TATGACAGAACTAGACACTCTT
CGGGGAGCATCGTCGCCCGCGAAGC AAAAAAAAAAAAA GACGCTAATAGTTAAGACGCTT
CGGCCCACGATGGAGGGGAATACAG AAAAAAAAAAAAA TATGACAGAACTAGACACTCTT
CCCATTCCCACCATCACACCCTGGT AAAAAAAAAAAAA GACGCTAATAGTTAAGACGCTT
TCGTCACCCACATAGGAGTCCTTCT AAAAAAAAAAAAA TATGACAGAACTAGACACTCTT
CCATGTTCAATGGGGTACTTCAGGG AAAAAAAAAAAAA GACGCTAATAGTTAAGACGCTT
CATGTCGTCCCAGTTGGTAACAATG AAAAAAAAAAAAA TATGACAGAACTAGACACTCTT
CAGCACAGGGTGCTCCTCAGGGGCC AAAAAAAAAAAAA GACGCTAATAGTTAAGACGCTT
TTAGGGTTCAGGGGGGCCTCGGTGA AAAAAAAAAAAAA TATGACAGAACTAGACACTCTT
CTGGGTCATCTTTTCACGGTTGGCC AAAAAAAAAAAAA GACGCTAATAGTTAAGACGCTT
GCTGGGGTGTTGAAGGTCTCAAACA AAAAAAAAAAAAA TATGACAGAACTAGACACTCTT
CACAGCCTGGATGGCTACGTACATG AAAAAAAAAAAAA GACGCTAATAGTTAAGACGCTT
TGCCTGTGGTACGACCAGAGGCATA AAAAAAAAAAAAA TATGACAGAACTAGACACTCTT
CAGTGTGGGTGACCCCGTCTCCGGA AAAAAAAAAAAAA GACGCTAATAGTTAAGACGCTT
CGTGAGGGAGAGCATAGCCCTCGTA AAAAAAAAAAAAA TATGACAGAACTAGACACTCTT
CCACGCTCGGTCAGGATCTTCATGA AAAAAAAAAAAAA GACGCTAATAGTTAAGACGCTT
CCTCTCAGCTGTGGTGGTGAAGCTG AAAAAAAAAAAAA TATGACAGAACTAGACACTCTT
AGCTTCTCTTTGATGTCACGCACGA AAAAAAAAAAAAA GACGCTAATAGTTAAGACGCTT
CTCGAAGTCTAGAGCAACATAGCAC AAAAAAAAAAAAA TATGACAGAACTAGACACTCTT
GGAGGAAGAGGATGCGGCAGTGGCC AAAAAAAAAAAAA GACGCTAATAGTTAAGACGCTT
CCGTCAGGCAGCTCATAGCTCTTCT AAAAAAAAAAAAA TATGACAGAACTAGACACTCTT
CTCGTTGCCAATAGTGATGACCTGG AAAAAAAAAAAAA GACGCTAATAGTTAAGACGCTT
GAAAAGAGCCTCAGGGCATCGGAAC AAAAAAAAAAAAA TATGACAGAACTAGACACTCTT
CACAGGATTCCATACCCAAGAAGGA AAAAAAAAAAAAA GACGCTAATAGTTAAGACGCTT
GAATTGAATGTAGTTTCATGGATGC AAAAAAAAAAAAA TATGACAGAACTAGACACTCTT
TTTACGGATGTCAACGTCACACTTC AAAAAAAAAAAAA GACGCTAATAGTTAAGACGCTT
ACAGCACTGTGTTGGCATAGAGGTC AAAAAAAAAAAAA TATGACAGAACTAGACACTCTT
AGAGCAGTAATCTCCTTCTGCATCC AAAAAAAAAAAAA GACGCTAATAGTTAAGACGCTT
ttgctgatccacatctgctggaagg AAAAAAAAAAAAA TATGACAGAACTAGACACTCTT
ggacagtgaggccaggatggagcca AAAAAAAAAAAAA GACGCTAATAGTTAAGACGCTT
CTTGATCTTCATGGTGCTAGGAGCC AAAAAAAAAAAAA TATGACAGAACTAGACACTCTT
B-actin mRNA transcript probes
tggggccggactcatcgtactcctg CTCgTAAATCCTCATCAATCATCCAgTAAACCgCC
ctagaagcacttgcggtgcacgatg CTCgTAAATCCTCATCAATCATCCAgTAAACCgCC
taaaacgcagctcagtaacagtccg CTCgTAAATCCTCATCAATCATCCAgTAAACCgCC
agttaggttttgtcaaagaaagggt CTCgTAAATCCTCATCAATCATCCAgTAAACCgCC
acaaagccatgccaatgttgtctct CTCgTAAATCCTCATCAATCATCCAgTAAACCgCC
gagtcaaaagcgccaaaacaaaaca CTCgTAAATCCTCATCAATCATCCAgTAAACCgCC
cttcaccgttccagtttttaaatcc CTCgTAAATCCTCATCAATCATCCAgTAAACCgCC
gtttgctccaaccaactgctgtcgc CTCgTAAATCCTCATCAATCATCCAgTAAACCgCC
ccacatttgtagaactttgggggat CTCgTAAATCCTCATCAATCATCCAgTAAACCgCC
acaaaacaatgtacaaagtcctcag CTCgTAAATCCTCATCAATCATCCAgTAAACCgCC
cctgtaaccacttatttcatggata CTCgTAAATCCTCATCAATCATCCAgTAAACCgCC
ggtggcttttgggagggtgagggac CTCgTAAATCCTCATCAATCATCCAgTAAACCgCC
cacagaagcaatgctgtcaccttcc CTCgTAAATCCTCATCAATCATCCAgTAAACCgCC
cagacctgggccattcagaaattaa CTCgTAAATCCTCATCAATCATCCAgTAAACCgCC
catacatcaagttggggggacaaaa CTCgTAAATCCTCATCAATCATCCAgTAAACCgCC
accccctcccagggagaccaaagcc CTCgTAAATCCTCATCAATCATCCAgTAAACCgCC
ggtctcaagtcagtgtacaggccag CTCgTAAATCCTCATCAATCATCCAgTAAACCgCC
gtgtaaggtaaggtgtgcactttta CTCgTAAATCCTCATCAATCATCCAgTAAACCgCC
FTH1 mRNA interaction probes
cttgcgagggagacgcggtggtcat AAAAAAAAAAAAA TATGACAGAACTAGACACTCTT
ccgcgtcctggtggtagttctggcg AAAAAAAAAAAAA TATGACAGAACTAGACACTCTT
ggttgatctggcggttgatggcagc AAAAAAAAAAAAA TATGACAGAACTAGACACTCTT
gatagacgtaggaggcatacaactc AAAAAAAAAAAAA TATGACAGAACTAGACACTCTT
tcggtcaaaataacaagacatagac AAAAAAAAAAAAA TATGACAGAACTAGACACTCTT
ggcaaagttcttcagagccacatca AAAAAAAAAAAAA TATGACAGAACTAGACACTCTT
tcatgagattggtggagaaagtatt AAAAAAAAAAAAA TATGACAGAACTAGACACTCTT
tcagtttctcggcatgctccctctc AAAAAAAAAAAAA TATGACAGAACTAGACACTCTT
gccacctcgctggttctgcagcttc AAAAAAAAAAAAA TATGACAGAACTAGACACTCTT
ttctttatatcctgcaggaagattc AAAAAAAAAAAAA TATGACAGAACTAGACACTCTT
cgctctcccagtcatcacggtctgg AAAAAAAAAAAAA TATGACAGAACTAGACACTCTT
cagtgcacactccattgcattcagc AAAAAAAAAAAAA TATGACAGAACTAGACACTCTT
gactgattcacactcttttccaagt AAAAAAAAAAAAA TATGACAGAACTAGACACTCTT
tagccagtttgtgcagttccagtag AAAAAAAAAAAAA TATGACAGAACTAGACACTCTT
cacataagtggggatcattcttgtc AAAAAAAAAAAAA TATGACAGAACTAGACACTCTT
cactcagataatacgtctcaatgaa AAAAAAAAAAAAA TATGACAGAACTAGACACTCTT
cagttctttaatggatttcacctgt AAAAAAAAAAAAA TATGACAGAACTAGACACTCTT
ttgcgtaagttggtcacgtggtcac AAAAAAAAAAAAA TATGACAGAACTAGACACTCTT
ccatgccagcttcaggggcacccat AAAAAAAAAAAAA TATGACAGAACTAGACACTCTT
ggtgtgcttgtcaaagagatattct AAAAAAAAAAAAA TATGACAGAACTAGACACTCTT
FTH1 mRNA transcript probes
cttatagcgggatcctgcgtcaggc CTCgTAAATCCTCATCAATCATCCAgTAAACCgCC
aacgtctggcgcaggaggggacagc CTCgTAAATCCTCATCAATCATCCAgTAAACCgCC
aggaaaccgcggcgactctgggcga CTCgTAAATCCTCATCAATCATCCAgTAAACCgCC
gggttccgttcaagcactgttgaag CTCgTAAATCCTCATCAATCATCCAgTAAACCgCC
ggcgggggtcggaggggtcgagcac CTCgTAAATCCTCATCAATCATCCAgTAAACCgCC
gcaaagggctcaggctcgaagcggc CTCgTAAATCCTCATCAATCATCCAgTAAACCgCC
cgctggagcggcggaacgacgaagt CTCgTAAATCCTCATCAATCATCCAgTAAACCgCC
cggcggggcgaggcgcggtggcgac CTCgTAAATCCTCATCAATCATCCAgTAAACCgCC
gcttagctctcatcaccgtgtccca CTCgTAAATCCTCATCAATCATCCAgTAAACCgCC
gtaaagtcacgtggctttggggaag CTCgTAAATCCTCATCAATCATCCAgTAAACCgCC
acatgcatgcactgcctcagtgacc CTCgTAAATCCTCATCAATCATCCAgTAAACCgCC
cttatagaaaagatgaaggcagcct CTCgTAAATCCTCATCAATCATCCAgTAAACCgCC
agaacttaagcagatgttttggtgc CTCgTAAATCCTCATCAATCATCCAgTAAACCgCC
ctttatttgaagaaatggtacaaat CTCgTAAATCCTCATCAATCATCCAgTAAACCgCC
acaaagaaaagaagctgggtaccaa CTCgTAAATCCTCATCAATCATCCAgTAAACCgCC
Linker probe
TCTAGTTCTGTCATA AAGCGTCTTAA AAAA GTCCCTGCCTCTATATCTCCACTCAACTTTAACCCG

## Sheet: Table S2
Table S2. Probes for human 18S rRNA
Human 18S ribosomal RNA probes
ttgagacaagcatatgctactggcaAAAAAAAAAAAAA GACGCTAATAGTTAAGACGCTT
cattcgcagtttcactgtaccggccAAAAAAAAAAAAA GACGCTAATAGTTAAGACGCTT
gaattaccacagttatccaagtaggAAAAAAAAAAAAA GACGCTAATAGTTAAGACGCTT
gggttggttttgatctgataaatgcAAAAAAAAAAAAA GACGCTAATAGTTAAGACGCTT
gatagggcagacgttcgaatgggtcAAAAAAAAAAAAA GACGCTAATAGTTAAGACGCTT
gttatttttcgtcactacctccccgAAAAAAAAAAAAA GACGCTAATAGTTAAGACGCTT
gtggactcattccaattacagggccAAAAAAAAAAAAA GACGCTAATAGTTAAGACGCTT
tacgctattggagctggaattaccgAAAAAAAAAAAAA GACGCTAATAGTTAAGACGCTT
gcgggacactcagctaagagcatcgAAAAAAAAAAAAA GACGCTAATAGTTAAGACGCTT
ctcgggcctgctttgaacactctaaAAAAAAAAAAAAA GACGCTAATAGTTAAGACGCTT
acaaaatagaaccgcggtcctattcAAAAAAAAAAAAA GACGCTAATAGTTAAGACGCTT
gtccaagaatttcacctctagcggcAAAAAAAAAAAAA GACGCTAATAGTTAAGACGCTT
aacctccgactttcgttcttgattaAAAAAAAAAAAAA GACGCTAATAGTTAAGACGCTT
catcgtttatggtcggaactacgacAAAAAAAAAAAAA GACGCTAATAGTTAAGACGCTT
aagtttcagctttgcaaccatactcAAAAAAAAAAAAA GACGCTAATAGTTAAGACGCTT
aggtttcccgtgttgagtcaaattaAAAAAAAAAAAAA GACGCTAATAGTTAAGACGCTT
cacccacggaatcgagaaagagctaAAAAAAAAAAAAA GACGCTAATAGTTAAGACGCTT
ggaattaaccagacaaatcgctccaAAAAAAAAAAAAA GACGCTAATAGTTAAGACGCTT
gtcgcgtaactagttagcatgccagAAAAAAAAAAAAA GACGCTAATAGTTAAGACGCTT
tgttattgctcaatctcgggtggctAAAAAAAAAAAAA GACGCTAATAGTTAAGACGCTT
tcacgaatggggttcaacgggttacAAAAAAAAAAAAA GACGCTAATAGTTAAGACGCTT
cacttactgggaattcctcgttcatAAAAAAAAAAAAA GACGCTAATAGTTAAGACGCTT
ggtgtgtacaaagggcagggacttaAAAAAAAAAAAAA GACGCTAATAGTTAAGACGCTT
agatagtcaagttcgaccgtcttctAAAAAAAAAAAAA GACGCTAATAGTTAAGACGCTT
